# Supplementary material
Source: publisher figshare collection journal article supplement (https://acs.figshare.com/ndownloader/files/5701206)
Supplement: Supplementary file 1 [file 5701206]

  
data_[Bu4N]2[Cu3(mu-Br)2(mu-pz)3Br3], 1a. 
  
_audit_creation_method            SHELXL-97 
_chemical_name_systematic 
; 
 ? 
; 
_chemical_name_common             ? 
_chemical_melting_point           ? 
_chemical_formula_moiety          ? 
_chemical_formula_sum 
 'C41 H80.60 Br5.40 Cu3 N8' 
_chemical_formula_weight          1307.87 
  
loop_ 
 _atom_type_symbol 
 _atom_type_description 
 _atom_type_scat_dispersion_real 
 _atom_type_scat_dispersion_imag 
 _atom_type_scat_source 
 'Cu'  'Cu'   0.3201   1.2651 
 'International Tables Vol C Tables 4.2.6.8 and 6.1.1.4' 
 'Br'  'Br'  -0.2901   2.4595 
 'International Tables Vol C Tables 4.2.6.8 and 6.1.1.4' 
 'N'  'N'   0.0061   0.0033 
 'International Tables Vol C Tables 4.2.6.8 and 6.1.1.4' 
 'C'  'C'   0.0033   0.0016 
 'International Tables Vol C Tables 4.2.6.8 and 6.1.1.4' 
 'H'  'H'   0.0000   0.0000 
 'International Tables Vol C Tables 4.2.6.8 and 6.1.1.4' 
  
_symmetry_cell_setting            Monoclinic 
_symmetry_space_group_name_H-M    C2/c 
  
loop_ 
 _symmetry_equiv_pos_as_xyz 
 'x, y, z' 
 '-x, y, -z+1/2' 
 'x+1/2, y+1/2, z' 
 '-x+1/2, y+1/2, -z+1/2' 
 '-x, -y, -z' 
 'x, -y, z-1/2' 
 '-x+1/2, -y+1/2, -z' 
 'x+1/2, -y+1/2, z-1/2' 
  
_cell_length_a                    17.578(3) 
_cell_length_b                    16.378(3) 
_cell_length_c                    19.488(3) 
_cell_angle_alpha                 90.00 
_cell_angle_beta                  95.498(4) 
_cell_angle_gamma                 90.00 
_cell_volume                      5584.7(17) 
_cell_formula_units_Z             4 
_cell_measurement_temperature     293(2) 
_cell_measurement_reflns_used     ? 
_cell_measurement_theta_min       ? 
_cell_measurement_theta_max       ? 
  
_exptl_crystal_description        prism 
_exptl_crystal_colour             green 
_exptl_crystal_size_max           0.16 
_exptl_crystal_size_mid           0.14 
_exptl_crystal_size_min           0.08 
_exptl_crystal_density_meas       ? 
_exptl_crystal_density_diffrn     1.556 
_exptl_crystal_density_method     'not measured' 
_exptl_crystal_F_000              2634 
_exptl_absorpt_coefficient_mu     5.029 
_exptl_absorpt_correction_type    none 
_exptl_absorpt_correction_T_min   ? 
_exptl_absorpt_correction_T_max   ? 
_exptl_absorpt_process_details    ? 
  
_exptl_special_details 
; 
 ? 
; 
  
_diffrn_ambient_temperature       293(2) 
_diffrn_radiation_wavelength      0.71073 
_diffrn_radiation_type            MoK\a 
_diffrn_radiation_source          'fine-focus sealed tube' 
_diffrn_radiation_monochromator   graphite 
_diffrn_measurement_device_type   'CCD area detector' 
_diffrn_measurement_method        'phi and omega scans' 
_diffrn_detector_area_resol_mean  ? 
_diffrn_standards_number          ? 
_diffrn_standards_interval_count  ? 
_diffrn_standards_interval_time   ? 
_diffrn_standards_decay_%         ? 
_diffrn_reflns_number             12023 
_diffrn_reflns_av_R_equivalents   0.0454 
_diffrn_reflns_av_sigmaI/netI     0.0498 
_diffrn_reflns_limit_h_min        -18 
_diffrn_reflns_limit_h_max        19 
_diffrn_reflns_limit_k_min        -17 
_diffrn_reflns_limit_k_max        18 
_diffrn_reflns_limit_l_min        -21 
_diffrn_reflns_limit_l_max        13 
_diffrn_reflns_theta_min          1.70 
_diffrn_reflns_theta_max          23.31 
_reflns_number_total              4031 
_reflns_number_gt                 2311 
_reflns_threshold_expression      >2sigma(I) 
  
_computing_data_collection        'Bruker SMART' 
_computing_cell_refinement        'Bruker SMART' 
_computing_data_reduction         'Bruker SHELXTL' 
_computing_structure_solution     'SHELXS-97 (Sheldrick, 1990)' 
_computing_structure_refinement   'SHELXL-97 (Sheldrick, 1997)' 
_computing_molecular_graphics     'Bruker SHELXTL' 
_computing_publication_material   'Bruker SHELXTL' 
  
_refine_special_details 
; 
 Refinement of F^2^ against ALL reflections.  The weighted R-factor wR and 
 goodness of fit S are based on F^2^, conventional R-factors R are based 
 on F, with F set to zero for negative F^2^. The threshold expression of 
 F^2^ > 2sigma(F^2^) is used only for calculating R-factors(gt) etc. and is 
 not relevant to the choice of reflections for refinement.  R-factors based 
 on F^2^ are statistically about twice as large as those based on F, and R- 
 factors based on ALL data will be even larger. 
; 
  
_refine_ls_structure_factor_coef  Fsqd 
_refine_ls_matrix_type            full 
_refine_ls_weighting_scheme       calc 
_refine_ls_weighting_details 
 'calc w=1/[\s^2^(Fo^2^)+(0.0840P)^2^+0.0000P] where P=(Fo^2^+2Fc^2^)/3' 
_atom_sites_solution_primary      direct 
_atom_sites_solution_secondary    difmap 
_atom_sites_solution_hydrogens    geom 
_refine_ls_hydrogen_treatment     mixed 
_refine_ls_extinction_method      none 
_refine_ls_extinction_coef        ? 
_refine_ls_number_reflns          4031 
_refine_ls_number_parameters      289 
_refine_ls_number_restraints      0 
_refine_ls_R_factor_all           0.0983 
_refine_ls_R_factor_gt            0.0519 
_refine_ls_wR_factor_ref          0.1446 
_refine_ls_wR_factor_gt           0.1254 
_refine_ls_goodness_of_fit_ref    0.962 
_refine_ls_restrained_S_all       0.962 
_refine_ls_shift/su_max           0.000 
_refine_ls_shift/su_mean          0.000 
  
loop_ 
 _atom_site_label 
 _atom_site_type_symbol 
 _atom_site_fract_x 
 _atom_site_fract_y 
 _atom_site_fract_z 
 _atom_site_U_iso_or_equiv 
 _atom_site_adp_type 
 _atom_site_occupancy 
 _atom_site_symmetry_multiplicity 
 _atom_site_calc_flag 
 _atom_site_refinement_flags 
 _atom_site_disorder_assembly 
 _atom_site_disorder_group 
Cu1 Cu 0.0000 0.12634(7) 0.2500 0.0832(4) Uani 1 2 d S . . 
Cu2 Cu 0.05813(6) 0.30588(5) 0.32841(5) 0.0866(3) Uani 1 1 d . . . 
Br1 Br 0.0000 -0.02292(7) 0.2500 0.1248(6) Uani 1 2 d S . . 
Br2 Br 0.13889(7) 0.37631(6) 0.41766(6) 0.1257(4) Uani 1 1 d . . . 
Br3 Br 0.10202(4) 0.24377(4) 0.22161(4) 0.0842(3) Uani 1 1 d . . . 
Br4 Br 0.0000 0.64416(16) 0.2500 0.1050(10) Uani 0.40 2 d SP . . 
N1 N 0.0374(3) 0.1312(4) 0.3463(3) 0.0803(17) Uani 1 1 d . . . 
N2 N 0.0622(4) 0.2021(4) 0.3764(4) 0.0908(19) Uani 1 1 d . . . 
N3 N 0.0217(3) 0.4051(3) 0.2810(3) 0.0753(16) Uani 1 1 d . . . 
N4 N 0.2685(3) -0.0049(4) 0.3329(3) 0.0825(17) Uani 1 1 d . . . 
C1 C 0.0801(6) 0.1848(7) 0.4434(5) 0.123(3) Uani 1 1 d . . . 
H1 H 0.1006 0.2222 0.4759 0.148 Uiso 1 1 calc R . . 
C2 C 0.0643(7) 0.1050(6) 0.4579(6) 0.126(4) Uani 1 1 d . . . 
H2 H 0.0692 0.0782 0.5002 0.152 Uiso 1 1 calc R . . 
C3 C 0.0399(5) 0.0754(5) 0.3953(6) 0.098(3) Uani 1 1 d . . . 
H3 H 0.0262 0.0212 0.3874 0.118 Uiso 1 1 calc R . . 
C4 C 0.0343(4) 0.4828(5) 0.3003(4) 0.089(2) Uani 1 1 d . . . 
H4 H 0.0617 0.4997 0.3410 0.107 Uiso 1 1 calc R . . 
C5 C 0.0000 0.5337(7) 0.2500 0.088(3) Uani 1 2 d S . . 
H5 H 0.0000 0.5905 0.2500 0.105 Uiso 0.60 2 calc SPR . . 
C6 C 0.3421(4) -0.0445(5) 0.3652(5) 0.095(2) Uani 1 1 d . . . 
H6A H 0.3469 -0.0977 0.3443 0.113 Uiso 1 1 calc R . . 
H6B H 0.3849 -0.0117 0.3533 0.113 Uiso 1 1 calc R . . 
C7 C 0.3493(6) -0.0551(5) 0.4408(5) 0.114(3) Uani 1 1 d . C . 
H7A H 0.3051 -0.0844 0.4543 0.137 Uiso 1 1 calc R . . 
H7B H 0.3507 -0.0020 0.4630 0.137 Uiso 1 1 calc R . . 
C8 C 0.4234(7) -0.1034(7) 0.4653(7) 0.146(4) Uani 1 1 d . . . 
H8A H 0.4178 -0.1578 0.4458 0.175 Uiso 1 1 calc R A 1 
H8B H 0.4653 -0.0775 0.4447 0.175 Uiso 1 1 calc R A 1 
C10 C 0.2573(5) 0.0788(5) 0.3626(4) 0.089(2) Uani 1 1 d . . . 
H10A H 0.2534 0.0733 0.4117 0.107 Uiso 1 1 calc R . . 
H10B H 0.2092 0.1007 0.3420 0.107 Uiso 1 1 calc R . . 
C11 C 0.3204(6) 0.1405(5) 0.3519(5) 0.110(3) Uani 1 1 d . . . 
H11A H 0.3685 0.1214 0.3751 0.132 Uiso 1 1 calc R . . 
H11B H 0.3264 0.1452 0.3031 0.132 Uiso 1 1 calc R . . 
C12 C 0.3011(6) 0.2225(5) 0.3800(5) 0.134(4) Uani 1 1 d . . . 
H12A H 0.2950 0.2172 0.4287 0.160 Uiso 1 1 calc R . . 
H12B H 0.2528 0.2408 0.3570 0.160 Uiso 1 1 calc R . . 
C13 C 0.3641(9) 0.2886(6) 0.3702(6) 0.180(6) Uani 1 1 d . . . 
H13A H 0.4135 0.2670 0.3858 0.270 Uiso 1 1 calc R . . 
H13B H 0.3544 0.3364 0.3966 0.270 Uiso 1 1 calc R . . 
H13C H 0.3628 0.3029 0.3223 0.270 Uiso 1 1 calc R . . 
C14 C 0.2743(5) -0.0033(5) 0.2558(4) 0.102(3) Uani 1 1 d . . . 
H14A H 0.3210 0.0249 0.2475 0.122 Uiso 1 1 calc R . . 
H14B H 0.2790 -0.0592 0.2401 0.122 Uiso 1 1 calc R . . 
C15 C 0.2092(6) 0.0360(6) 0.2127(5) 0.128(3) Uani 1 1 d . . . 
H15A H 0.1972 0.0879 0.2332 0.153 Uiso 1 1 calc R . . 
H15B H 0.1644 0.0014 0.2120 0.153 Uiso 1 1 calc R . . 
C16 C 0.2283(8) 0.0502(9) 0.1399(6) 0.187(7) Uani 1 1 d . . . 
H16A H 0.2710 0.0879 0.1423 0.225 Uiso 1 1 calc R . . 
H16B H 0.2467 -0.0013 0.1232 0.225 Uiso 1 1 calc R . . 
C17 C 0.1750(10) 0.0788(10) 0.0904(7) 0.245(8) Uani 1 1 d . . . 
H17A H 0.1799 0.1370 0.0868 0.367 Uiso 1 1 calc R . . 
H17B H 0.1249 0.0655 0.1025 0.367 Uiso 1 1 calc R . . 
H17C H 0.1828 0.0541 0.0469 0.367 Uiso 1 1 calc R . . 
C18 C 0.2001(4) -0.0551(5) 0.3502(4) 0.093(2) Uani 1 1 d . . . 
H18A H 0.1974 -0.0525 0.3996 0.112 Uiso 1 1 calc R . . 
H18B H 0.1543 -0.0295 0.3283 0.112 Uiso 1 1 calc R . . 
C19 C 0.1994(6) -0.1425(5) 0.3295(6) 0.122(3) Uani 1 1 d . C . 
H19A H 0.2453 -0.1692 0.3500 0.147 Uiso 1 1 calc R . . 
H19B H 0.1987 -0.1466 0.2798 0.147 Uiso 1 1 calc R . . 
C20 C 0.1285(9) -0.1856(9) 0.3533(9) 0.162(6) Uani 1 1 d . . . 
H20A H 0.0844 -0.1670 0.3237 0.195 Uiso 1 1 calc R B 1 
H20B H 0.1340 -0.2435 0.3449 0.195 Uiso 1 1 calc R B 1 
C9A C 0.4449(10) -0.1120(9) 0.5321(9) 0.131(6) Uani 0.650(15) 1 d P C 1 
H9A1 H 0.4069 -0.1426 0.5533 0.196 Uiso 0.650(15) 1 calc PR C 1 
H9A2 H 0.4506 -0.0592 0.5532 0.196 Uiso 0.650(15) 1 calc PR C 1 
H9A3 H 0.4928 -0.1406 0.5380 0.196 Uiso 0.650(15) 1 calc PR C 1 
C21A C 0.113(2) -0.1771(19) 0.4158(18) 0.31(2) Uani 0.650(15) 1 d P C 1 
H21A H 0.0618 -0.1960 0.4200 0.462 Uiso 0.650(15) 1 calc PR C 1 
H21B H 0.1168 -0.1205 0.4285 0.462 Uiso 0.650(15) 1 calc PR C 1 
H21C H 0.1483 -0.2084 0.4457 0.462 Uiso 0.650(15) 1 calc PR C 1 
C9B C 0.406(3) -0.200(3) 0.474(2) 0.24(3) Uani 0.350(15) 1 d P C 2 
H9B1 H 0.4392 -0.2220 0.5118 0.353 Uiso 0.350(15) 1 calc PR C 2 
H9B2 H 0.4144 -0.2286 0.4325 0.353 Uiso 0.350(15) 1 calc PR C 2 
H9B3 H 0.3537 -0.2075 0.4837 0.353 Uiso 0.350(15) 1 calc PR C 2 
C21B C 0.110(3) -0.264(2) 0.3311(18) 0.21(2) Uani 0.350(15) 1 d P C 2 
H21D H 0.1450 -0.3019 0.3551 0.319 Uiso 0.350(15) 1 calc PR C 2 
H21E H 0.1145 -0.2677 0.2825 0.319 Uiso 0.350(15) 1 calc PR C 2 
H21F H 0.0590 -0.2764 0.3404 0.319 Uiso 0.350(15) 1 calc PR C 2 
  
loop_ 
 _atom_site_aniso_label 
 _atom_site_aniso_U_11 
 _atom_site_aniso_U_22 
 _atom_site_aniso_U_33 
 _atom_site_aniso_U_23 
 _atom_site_aniso_U_13 
 _atom_site_aniso_U_12 
Cu1 0.0634(8) 0.0653(8) 0.1197(11) 0.000 0.0031(7) 0.000 
Cu2 0.0934(8) 0.0705(6) 0.0964(7) -0.0012(5) 0.0117(5) -0.0031(5) 
Br1 0.0958(10) 0.0698(7) 0.1974(15) 0.000 -0.0450(10) 0.000 
Br2 0.1303(9) 0.1008(7) 0.1391(9) -0.0142(6) -0.0220(7) -0.0088(6) 
Br3 0.0690(5) 0.0772(5) 0.1102(6) -0.0023(4) 0.0287(4) -0.0021(4) 
Br4 0.099(2) 0.0584(16) 0.161(3) 0.000 0.031(2) 0.000 
N1 0.061(4) 0.068(4) 0.113(5) 0.009(4) 0.018(3) 0.010(3) 
N2 0.089(5) 0.083(5) 0.100(5) 0.009(4) 0.009(4) 0.003(4) 
N3 0.068(4) 0.064(4) 0.096(5) -0.001(3) 0.018(3) -0.002(3) 
N4 0.054(4) 0.078(4) 0.118(5) -0.007(3) 0.017(3) 0.006(3) 
C1 0.131(9) 0.139(9) 0.096(8) 0.005(6) 0.000(6) -0.002(7) 
C2 0.170(11) 0.096(8) 0.116(9) 0.038(6) 0.024(7) 0.000(7) 
C3 0.089(6) 0.078(6) 0.133(8) 0.024(6) 0.031(6) 0.006(5) 
C4 0.068(5) 0.082(6) 0.121(7) -0.018(5) 0.032(5) -0.012(4) 
C5 0.080(8) 0.065(7) 0.124(10) 0.000 0.037(7) 0.000 
C6 0.058(5) 0.094(6) 0.131(8) -0.004(5) 0.005(5) 0.011(4) 
C7 0.102(7) 0.105(7) 0.133(8) -0.002(6) -0.006(6) 0.015(6) 
C8 0.119(9) 0.142(10) 0.167(13) 0.006(8) -0.034(8) 0.004(8) 
C10 0.076(6) 0.088(5) 0.105(6) -0.008(4) 0.018(4) 0.007(4) 
C11 0.119(8) 0.093(6) 0.117(7) 0.001(5) 0.009(6) -0.002(6) 
C12 0.156(10) 0.099(7) 0.136(8) -0.008(6) -0.035(7) 0.000(7) 
C13 0.265(18) 0.107(8) 0.157(10) 0.005(7) -0.037(10) -0.038(10) 
C14 0.089(7) 0.107(6) 0.113(7) -0.027(5) 0.030(5) -0.001(5) 
C15 0.110(8) 0.160(9) 0.108(8) -0.001(6) -0.008(6) 0.043(7) 
C16 0.182(14) 0.267(16) 0.107(10) -0.033(9) -0.022(9) 0.103(12) 
C17 0.25(2) 0.34(2) 0.148(13) 0.017(13) 0.038(13) 0.108(17) 
C18 0.066(5) 0.093(6) 0.119(6) -0.006(5) 0.007(4) 0.005(5) 
C19 0.100(7) 0.093(7) 0.174(9) -0.022(6) 0.007(6) -0.018(6) 
C20 0.158(13) 0.097(9) 0.224(15) 0.014(10) -0.025(12) -0.018(8) 
C9A 0.162(16) 0.123(12) 0.105(13) 0.023(9) -0.001(11) -0.002(11) 
C21A 0.37(5) 0.20(3) 0.36(5) 0.03(3) 0.04(4) -0.15(3) 
C9B 0.22(5) 0.34(7) 0.15(3) 0.09(4) -0.01(3) -0.05(5) 
C21B 0.32(6) 0.16(4) 0.17(4) -0.03(3) 0.06(4) -0.13(4) 
  
_geom_special_details 
; 
 All esds (except the esd in the dihedral angle between two l.s. planes) 
 are estimated using the full covariance matrix.  The cell esds are taken 
 into account individually in the estimation of esds in distances, angles 
 and torsion angles; correlations between esds in cell parameters are only 
 used when they are defined by crystal symmetry.  An approximate (isotropic) 
 treatment of cell esds is used for estimating esds involving l.s. planes. 
; 
  
loop_ 
 _geom_bond_atom_site_label_1 
 _geom_bond_atom_site_label_2 
 _geom_bond_distance 
 _geom_bond_site_symmetry_2 
 _geom_bond_publ_flag 
Cu1 N1 1.929(7) 2 ? 
Cu1 N1 1.929(7) . ? 
Cu1 Br1 2.4446(17) . ? 
Cu1 Br3 2.7224(11) . ? 
Cu1 Br3 2.7224(11) 2 ? 
Cu2 N2 1.939(6) . ? 
Cu2 N3 1.947(6) . ? 
Cu2 Br2 2.4286(13) . ? 
Cu2 Br3 2.5040(13) . ? 
Br4 C5 1.810(11) . ? 
N1 C3 1.320(9) . ? 
N1 N2 1.355(8) . ? 
N2 C1 1.343(10) . ? 
N3 C4 1.340(8) . ? 
N3 N3 1.364(11) 2 ? 
N4 C10 1.509(9) . ? 
N4 C14 1.515(9) . ? 
N4 C18 1.520(9) . ? 
N4 C6 1.528(9) . ? 
C1 C2 1.370(12) . ? 
C2 C3 1.343(12) . ? 
C4 C5 1.381(9) . ? 
C5 C4 1.381(9) 2 ? 
C6 C7 1.477(11) . ? 
C7 C8 1.559(13) . ? 
C8 C9A 1.327(16) . ? 
C8 C9B 1.63(5) . ? 
C10 C11 1.528(11) . ? 
C11 C12 1.502(11) . ? 
C12 C13 1.573(15) . ? 
C14 C15 1.498(11) . ? 
C15 C16 1.507(14) . ? 
C16 C17 1.361(16) . ? 
C18 C19 1.487(10) . ? 
C19 C20 1.541(17) . ? 
C20 C21A 1.28(3) . ? 
C20 C21B 1.38(3) . ? 
  
loop_ 
 _geom_angle_atom_site_label_1 
 _geom_angle_atom_site_label_2 
 _geom_angle_atom_site_label_3 
 _geom_angle 
 _geom_angle_site_symmetry_1 
 _geom_angle_site_symmetry_3 
 _geom_angle_publ_flag 
N1 Cu1 N1 175.3(4) 2 . ? 
N1 Cu1 Br1 92.36(19) 2 . ? 
N1 Cu1 Br1 92.36(19) . . ? 
N1 Cu1 Br3 86.73(17) 2 . ? 
N1 Cu1 Br3 89.9(2) . . ? 
Br1 Cu1 Br3 134.95(2) . . ? 
N1 Cu1 Br3 89.9(2) 2 2 ? 
N1 Cu1 Br3 86.73(17) . 2 ? 
Br1 Cu1 Br3 134.95(2) . 2 ? 
Br3 Cu1 Br3 90.10(5) . 2 ? 
N2 Cu2 N3 163.0(3) . . ? 
N2 Cu2 Br2 94.5(2) . . ? 
N3 Cu2 Br2 94.99(17) . . ? 
N2 Cu2 Br3 92.6(2) . . ? 
N3 Cu2 Br3 93.32(17) . . ? 
Br2 Cu2 Br3 125.64(6) . . ? 
Cu2 Br3 Cu1 81.76(3) . . ? 
C3 N1 N2 106.9(7) . . ? 
C3 N1 Cu1 131.4(7) . . ? 
N2 N1 Cu1 121.5(5) . . ? 
C1 N2 N1 106.0(7) . . ? 
C1 N2 Cu2 130.5(7) . . ? 
N1 N2 Cu2 123.1(6) . . ? 
C4 N3 N3 108.2(4) . 2 ? 
C4 N3 Cu2 128.4(5) . . ? 
N3 N3 Cu2 123.41(17) 2 . ? 
C10 N4 C14 112.8(6) . . ? 
C10 N4 C18 105.8(6) . . ? 
C14 N4 C18 110.9(6) . . ? 
C10 N4 C6 111.3(6) . . ? 
C14 N4 C6 106.4(6) . . ? 
C18 N4 C6 109.6(6) . . ? 
N2 C1 C2 111.6(9) . . ? 
C3 C2 C1 102.1(9) . . ? 
N1 C3 C2 113.2(8) . . ? 
N3 C4 C5 108.9(8) . . ? 
C4 C5 C4 105.7(10) 2 . ? 
C4 C5 Br4 127.2(5) 2 . ? 
C4 C5 Br4 127.2(5) . . ? 
C7 C6 N4 116.7(7) . . ? 
C6 C7 C8 110.7(9) . . ? 
C9A C8 C7 120.3(13) . . ? 
C9A C8 C9B 80.3(16) . . ? 
C7 C8 C9B 111.5(19) . . ? 
N4 C10 C11 115.2(6) . . ? 
C12 C11 C10 110.4(8) . . ? 
C11 C12 C13 112.7(10) . . ? 
C15 C14 N4 116.4(7) . . ? 
C14 C15 C16 111.6(9) . . ? 
C17 C16 C15 121.4(13) . . ? 
C19 C18 N4 116.6(7) . . ? 
C18 C19 C20 110.2(9) . . ? 
C21A C20 C21B 110(2) . . ? 
C21A C20 C19 119(2) . . ? 
C21B C20 C19 120(2) . . ? 
  
_diffrn_measured_fraction_theta_max    0.995 
_diffrn_reflns_theta_full              23.31 
_diffrn_measured_fraction_theta_full   0.995 
_refine_diff_density_max    0.780 
_refine_diff_density_min   -0.402 
_refine_diff_density_rms    0.099 
  
-----------------------------------------------------------------------------------------
  
data_ (Bu4N)2[Cu3(mu3-Br)2(mu-4-NO2-pz)3Br3], 1b.
  
_audit_creation_method            SHELXL-97 
_chemical_name_systematic 
; 
 ? 
; 
_chemical_name_common             ? 
_chemical_melting_point           ? 
_chemical_formula_moiety          '(Bu4N)2[Cu3(mu3-Br)2(mu-4-NO2-pz)3Br3]' 
_chemical_formula_sum 
 'C41 H78 Br5 Cu3 N11 O6' 
_chemical_formula_weight          1411.31 
  
loop_ 
 _atom_type_symbol 
 _atom_type_description 
 _atom_type_scat_dispersion_real 
 _atom_type_scat_dispersion_imag 
 _atom_type_scat_source 
 'C'  'C'   0.0033   0.0016 
 'International Tables Vol C Tables 4.2.6.8 and 6.1.1.4' 
 'H'  'H'   0.0000   0.0000 
 'International Tables Vol C Tables 4.2.6.8 and 6.1.1.4' 
 'N'  'N'   0.0061   0.0033 
 'International Tables Vol C Tables 4.2.6.8 and 6.1.1.4' 
 'Cu'  'Cu'   0.3201   1.2651 
 'International Tables Vol C Tables 4.2.6.8 and 6.1.1.4' 
 'Br'  'Br'  -0.2901   2.4595 
 'International Tables Vol C Tables 4.2.6.8 and 6.1.1.4' 
 'O'  'O'   0.0106   0.0060 
 'International Tables Vol C Tables 4.2.6.8 and 6.1.1.4' 
  
_symmetry_cell_setting            Triclinic 
_symmetry_space_group_name_H-M    P-1 
  
loop_ 
 _symmetry_equiv_pos_as_xyz 
 'x, y, z' 
 '-x, -y, -z' 
  
_cell_length_a                    9.9393(13) 
_cell_length_b                    12.7224(17) 
_cell_length_c                    25.515(3) 
_cell_angle_alpha                 81.138(3) 
_cell_angle_beta                  81.202(3) 
_cell_angle_gamma                 68.948(2) 
_cell_volume                      2958.4(7) 
_cell_formula_units_Z             2 
_cell_measurement_temperature     308(2) 
_cell_measurement_reflns_used     ? 
_cell_measurement_theta_min       ? 
_cell_measurement_theta_max       ? 
  
_exptl_crystal_description        plate 
_exptl_crystal_colour             green 
_exptl_crystal_size_max           0.10 
_exptl_crystal_size_mid           0.06 
_exptl_crystal_size_min           0.02 
_exptl_crystal_density_meas       ? 
_exptl_crystal_density_diffrn     1.584 
_exptl_crystal_density_method     'not measured' 
_exptl_crystal_F_000              1422 
_exptl_absorpt_coefficient_mu     4.494 
_exptl_absorpt_correction_type    none 
_exptl_absorpt_correction_T_min   ? 
_exptl_absorpt_correction_T_max   ? 
_exptl_absorpt_process_details    ? 
  
_exptl_special_details 
; 
 ? 
; 
  
_diffrn_ambient_temperature       308(2) 
_diffrn_radiation_wavelength      0.71073 
_diffrn_radiation_type            MoK\a 
_diffrn_radiation_source          'fine-focus sealed tube' 
_diffrn_radiation_monochromator   graphite 
_diffrn_measurement_device_type   'Bruker AXS SMART CCD area detector'
_diffrn_measurement_method        'phi and omega scans' 
_diffrn_detector_area_resol_mean  ? 
_diffrn_standards_number          ? 
_diffrn_standards_interval_count  ? 
_diffrn_standards_interval_time   ? 
_diffrn_standards_decay_%         ? 
_diffrn_reflns_number             13162 
_diffrn_reflns_av_R_equivalents   0.0434 
_diffrn_reflns_av_sigmaI/netI     0.1260 
_diffrn_reflns_limit_h_min        -11 
_diffrn_reflns_limit_h_max        9 
_diffrn_reflns_limit_k_min        -14 
_diffrn_reflns_limit_k_max        13 
_diffrn_reflns_limit_l_min        -28 
_diffrn_reflns_limit_l_max        18 
_diffrn_reflns_theta_min          1.83 
_diffrn_reflns_theta_max          23.28 
_reflns_number_total              8478 
_reflns_number_gt                 3923 
_reflns_threshold_expression      >2sigma(I) 
  
_computing_data_collection        'BRUKER SMART-NT V5.0' 
_computing_cell_refinement        'BRUKER SMART-NT V5.0' 
_computing_data_reduction         'BRUKER SAINT-NT V5/6.0' 
_computing_structure_solution     'BRUKER SHELXTL-NT V5.1' 
_computing_structure_refinement   'BRUKER SHELXTL-NT V5.1' 
_computing_molecular_graphics     'BRUKER SHELXTL-NT V5.1' 
_computing_publication_material   'BRUKER SHELXTL-NT V5.1'
  
_refine_special_details 
; 
 Refinement of F^2^ against ALL reflections.  The weighted R-factor wR and 
 goodness of fit S are based on F^2^, conventional R-factors R are based 
 on F, with F set to zero for negative F^2^. The threshold expression of 
 F^2^ > 2sigma(F^2^) is used only for calculating R-factors(gt) etc. and is 
 not relevant to the choice of reflections for refinement.  R-factors based 
 on F^2^ are statistically about twice as large as those based on F, and R- 
 factors based on ALL data will be even larger. 
; 
  
_refine_ls_structure_factor_coef  Fsqd 
_refine_ls_matrix_type            full 
_refine_ls_weighting_scheme       calc 
_refine_ls_weighting_details 
 'calc w=1/[\s^2^(Fo^2^)+(0.0484P)^2^+0.0000P] where P=(Fo^2^+2Fc^2^)/3' 
_atom_sites_solution_primary      direct 
_atom_sites_solution_secondary    difmap 
_atom_sites_solution_hydrogens    geom 
_refine_ls_hydrogen_treatment     mixed 
_refine_ls_extinction_method      none 
_refine_ls_extinction_coef        ? 
_refine_ls_number_reflns          8478 
_refine_ls_number_parameters      603 
_refine_ls_number_restraints      0 
_refine_ls_R_factor_all           0.1493 
_refine_ls_R_factor_gt            0.0559 
_refine_ls_wR_factor_ref          0.1192 
_refine_ls_wR_factor_gt           0.0960 
_refine_ls_goodness_of_fit_ref    0.881 
_refine_ls_restrained_S_all       0.881 
_refine_ls_shift/su_max           0.005 
_refine_ls_shift/su_mean          0.000 
  
loop_ 
 _atom_site_label 
 _atom_site_type_symbol 
 _atom_site_fract_x 
 _atom_site_fract_y 
 _atom_site_fract_z 
 _atom_site_U_iso_or_equiv 
 _atom_site_adp_type 
 _atom_site_occupancy 
 _atom_site_symmetry_multiplicity 
 _atom_site_calc_flag 
 _atom_site_refinement_flags 
 _atom_site_disorder_assembly 
 _atom_site_disorder_group 
Br1 Br 0.24458(13) 0.97144(9) 0.07412(4) 0.0989(4) Uani 1 1 d . . . 
Br2 Br -0.14550(14) 1.25375(9) 0.32490(4) 0.1180(5) Uani 1 1 d . . . 
Br3 Br 0.35793(16) 0.64406(11) 0.34813(5) 0.1467(6) Uani 1 1 d . . . 
Br4 Br -0.02297(10) 0.91390(8) 0.24000(4) 0.0806(3) Uani 1 1 d . . . 
Br5 Br 0.29342(9) 0.98528(7) 0.25466(3) 0.0675(3) Uani 1 1 d . . . 
Cu1 Cu 0.18018(11) 0.95956(8) 0.16989(4) 0.0678(3) Uani 1 1 d . . . 
Cu2 Cu -0.00574(12) 1.08546(9) 0.28215(4) 0.0750(4) Uani 1 1 d . . . 
Cu3 Cu 0.21945(14) 0.80662(9) 0.29301(5) 0.0920(4) Uani 1 1 d . . . 
O1 O -0.0440(8) 1.4167(5) 0.0660(3) 0.114(3) Uani 1 1 d . . . 
O2 O -0.1609(8) 1.4941(6) 0.1371(3) 0.107(2) Uani 1 1 d . . . 
O3 O -0.1809(13) 0.9830(11) 0.5041(4) 0.188(5) Uani 1 1 d . . . 
O4 O -0.0318(13) 0.8096(10) 0.5108(4) 0.208(5) Uani 1 1 d . . . 
O5 O 0.5528(10) 0.4298(7) 0.1733(4) 0.155(4) Uani 1 1 d . . . 
O6 O 0.5203(10) 0.5243(7) 0.0943(4) 0.141(4) Uani 1 1 d . . . 
N1 N 0.0657(7) 1.1203(5) 0.1667(3) 0.0587(18) Uani 1 1 d . . . 
N2 N -0.0122(7) 1.1698(6) 0.2116(3) 0.0600(18) Uani 1 1 d . . . 
N3 N 0.0132(9) 0.9912(7) 0.3488(3) 0.077(2) Uani 1 1 d . . . 
N4 N 0.1000(9) 0.8802(8) 0.3537(3) 0.087(2) Uani 1 1 d . . . 
N5 N 0.3095(8) 0.7381(7) 0.2274(3) 0.079(2) Uani 1 1 d . . . 
N6 N 0.2915(7) 0.7970(6) 0.1780(3) 0.067(2) Uani 1 1 d . . . 
N7 N -0.0869(9) 1.4118(7) 0.1135(4) 0.077(2) Uani 1 1 d . . . 
N8 N -0.0836(15) 0.9045(13) 0.4878(5) 0.146(5) Uani 1 1 d . . . 
N9 N 0.5052(11) 0.5148(9) 0.1429(5) 0.106(3) Uani 1 1 d . . . 
N10 N 0.7626(7) 0.8222(5) 0.1047(3) 0.0579(18) Uani 1 1 d . . . 
N11 N 0.3260(10) 0.2826(7) 0.3651(4) 0.092(2) Uani 1 1 d . . . 
C1 C -0.0778(9) 1.2784(8) 0.1969(4) 0.068(3) Uani 1 1 d . . . 
H1 H -0.1388 1.3309 0.2194 0.082 Uiso 1 1 calc R . . 
C2 C -0.0428(10) 1.3023(8) 0.1438(4) 0.067(2) Uani 1 1 d . . . 
C3 C 0.0468(9) 1.2019(8) 0.1262(4) 0.068(2) Uani 1 1 d . . . 
H3 H 0.0883 1.1921 0.0913 0.081 Uiso 1 1 calc R . . 
C4 C 0.0760(14) 0.8346(10) 0.4035(5) 0.112(4) Uani 1 1 d . . . 
H4 H 0.1198 0.7593 0.4165 0.134 Uiso 1 1 calc R . . 
C5 C -0.0233(15) 0.9165(11) 0.4320(5) 0.108(4) Uani 1 1 d . . . 
C6 C -0.0621(11) 1.0140(9) 0.3969(5) 0.096(3) Uani 1 1 d . . . 
H6 H -0.1289 1.0839 0.4051 0.116 Uiso 1 1 calc R . . 
C7 C 0.3585(10) 0.7258(9) 0.1406(4) 0.077(3) Uani 1 1 d . . . 
H7 H 0.3630 0.7445 0.1038 0.092 Uiso 1 1 calc R . . 
C8 C 0.4195(10) 0.6193(9) 0.1673(5) 0.080(3) Uani 1 1 d . . . 
C9 C 0.3860(11) 0.6290(8) 0.2207(5) 0.089(3) Uani 1 1 d . . . 
H9 H 0.4118 0.5701 0.2479 0.107 Uiso 1 1 calc R . . 
C10 C 0.6955(9) 0.7642(7) 0.1534(3) 0.072(3) Uani 1 1 d . . . 
H10A H 0.5927 0.8073 0.1586 0.086 Uiso 1 1 calc R . . 
H10B H 0.7050 0.6896 0.1453 0.086 Uiso 1 1 calc R . . 
C11 C 0.7587(11) 0.7507(9) 0.2050(4) 0.105(4) Uani 1 1 d . . . 
H11A H 0.7416 0.8247 0.2157 0.126 Uiso 1 1 calc R . . 
H11B H 0.8626 0.7115 0.2001 0.126 Uiso 1 1 calc R . . 
C12 C 0.6906(13) 0.6845(13) 0.2479(4) 0.155(6) Uani 1 1 d . . . 
H12A H 0.5902 0.7301 0.2569 0.186 Uiso 1 1 calc R . . 
H12B H 0.6919 0.6170 0.2343 0.186 Uiso 1 1 calc R . . 
C13 C 0.7615(17) 0.6531(14) 0.2935(6) 0.225(8) Uani 1 1 d . . . 
H13A H 0.8482 0.6721 0.2870 0.338 Uiso 1 1 calc R . . 
H13B H 0.7865 0.5729 0.3030 0.338 Uiso 1 1 calc R . . 
H13C H 0.6991 0.6924 0.3222 0.338 Uiso 1 1 calc R . . 
C14 C 0.9193(9) 0.7529(7) 0.0946(3) 0.072(3) Uani 1 1 d . . . 
H14A H 0.9268 0.6751 0.0935 0.086 Uiso 1 1 calc R . . 
H14B H 0.9675 0.7540 0.1247 0.086 Uiso 1 1 calc R . . 
C15 C 1.0013(10) 0.7889(8) 0.0442(4) 0.091(3) Uani 1 1 d . . . 
H15A H 0.9444 0.8038 0.0144 0.109 Uiso 1 1 calc R . . 
H15B H 1.0165 0.8582 0.0482 0.109 Uiso 1 1 calc R . . 
C16 C 1.1464(11) 0.6972(9) 0.0325(4) 0.110(4) Uani 1 1 d . . . 
H16A H 1.1302 0.6285 0.0280 0.132 Uiso 1 1 calc R . . 
H16B H 1.2013 0.6810 0.0629 0.132 Uiso 1 1 calc R . . 
C17 C 1.2347(11) 0.7296(10) -0.0168(5) 0.149(5) Uani 1 1 d . . . 
H17A H 1.1892 0.7324 -0.0478 0.223 Uiso 1 1 calc R . . 
H17B H 1.3306 0.6743 -0.0192 0.223 Uiso 1 1 calc R . . 
H17C H 1.2402 0.8026 -0.0146 0.223 Uiso 1 1 calc R . . 
C18 C 0.7494(9) 0.9408(7) 0.1146(3) 0.074(3) Uani 1 1 d . . . 
H18A H 0.8065 0.9341 0.1433 0.089 Uiso 1 1 calc R . . 
H18B H 0.7914 0.9752 0.0828 0.089 Uiso 1 1 calc R . . 
C19 C 0.5970(11) 1.0196(9) 0.1286(4) 0.110(4) Uani 1 1 d . . . 
H19A H 0.5402 1.0295 0.0993 0.132 Uiso 1 1 calc R . . 
H19B H 0.5531 0.9848 0.1597 0.132 Uiso 1 1 calc R . . 
C20 C 0.5907(15) 1.1344(10) 0.1400(5) 0.147(5) Uani 1 1 d . . . 
H20A H 0.6440 1.1646 0.1101 0.177 Uiso 1 1 calc R . . 
H20B H 0.4903 1.1843 0.1412 0.177 Uiso 1 1 calc R . . 
C21 C 0.6423(15) 1.1395(11) 0.1849(7) 0.192(8) Uani 1 1 d . . . 
H21A H 0.6234 1.0842 0.2123 0.288 Uiso 1 1 calc R . . 
H21B H 0.5954 1.2138 0.1963 0.288 Uiso 1 1 calc R . . 
H21C H 0.7449 1.1242 0.1781 0.288 Uiso 1 1 calc R . . 
C22 C 0.6816(8) 0.8307(7) 0.0566(3) 0.068(2) Uani 1 1 d . . . 
H22A H 0.5784 0.8648 0.0668 0.081 Uiso 1 1 calc R . . 
H22B H 0.7091 0.8814 0.0281 0.081 Uiso 1 1 calc R . . 
C23 C 0.7087(10) 0.7191(7) 0.0350(3) 0.077(3) Uani 1 1 d . . . 
H23A H 0.8114 0.6839 0.0244 0.093 Uiso 1 1 calc R . . 
H23B H 0.6788 0.6681 0.0627 0.093 Uiso 1 1 calc R . . 
C24 C 0.6244(10) 0.7397(8) -0.0125(3) 0.084(3) Uani 1 1 d . . . 
H24A H 0.5214 0.7700 -0.0009 0.101 Uiso 1 1 calc R . . 
H24B H 0.6486 0.7958 -0.0386 0.101 Uiso 1 1 calc R . . 
C25 C 0.6561(11) 0.6327(8) -0.0383(4) 0.111(4) Uani 1 1 d . . . 
H25A H 0.7568 0.6048 -0.0516 0.166 Uiso 1 1 calc R . . 
H25B H 0.5979 0.6492 -0.0673 0.166 Uiso 1 1 calc R . . 
H25C H 0.6337 0.5765 -0.0125 0.166 Uiso 1 1 calc R . . 
C26 C 0.3754(14) 0.1537(9) 0.3726(4) 0.113(4) Uani 1 1 d . . . 
H26A H 0.3651 0.1297 0.4106 0.135 Uiso 1 1 calc R . . 
H26B H 0.3101 0.1305 0.3563 0.135 Uiso 1 1 calc R . . 
C27 C 0.5271(15) 0.0915(11) 0.3507(5) 0.148(5) Uani 1 1 d . . . 
H27A H 0.5925 0.1162 0.3662 0.177 Uiso 1 1 calc R . . 
H27B H 0.5367 0.1135 0.3125 0.177 Uiso 1 1 calc R . . 
C28 C 0.577(2) -0.0376(14) 0.3600(7) 0.204(8) Uani 1 1 d . . . 
H28A H 0.5199 -0.0624 0.3400 0.244 Uiso 1 1 calc R . . 
H28B H 0.6768 -0.0673 0.3449 0.244 Uiso 1 1 calc R . . 
C29 C 0.568(2) -0.0830(15) 0.4078(8) 0.281(12) Uani 1 1 d . . . 
H29A H 0.6339 -0.1598 0.4102 0.421 Uiso 1 1 calc R . . 
H29B H 0.4708 -0.0822 0.4187 0.421 Uiso 1 1 calc R . . 
H29C H 0.5927 -0.0411 0.4308 0.421 Uiso 1 1 calc R . . 
C30 C 0.3324(11) 0.3303(8) 0.3063(4) 0.097(3) Uani 1 1 d . . . 
H30A H 0.2989 0.4123 0.3042 0.116 Uiso 1 1 calc R . . 
H30B H 0.4327 0.3049 0.2909 0.116 Uiso 1 1 calc R . . 
C31 C 0.2446(12) 0.2971(9) 0.2736(5) 0.117(4) Uani 1 1 d . . . 
H31A H 0.1457 0.3165 0.2905 0.140 Uiso 1 1 calc R . . 
H31B H 0.2836 0.2156 0.2727 0.140 Uiso 1 1 calc R . . 
C32 C 0.2435(13) 0.3557(11) 0.2158(5) 0.135(5) Uani 1 1 d . . . 
H32A H 0.3403 0.3567 0.2034 0.162 Uiso 1 1 calc R . . 
H32B H 0.2222 0.3097 0.1935 0.162 Uiso 1 1 calc R . . 
C33 C 0.1438(14) 0.4687(12) 0.2078(5) 0.171(6) Uani 1 1 d . . . 
H33A H 0.0464 0.4684 0.2164 0.256 Uiso 1 1 calc R . . 
H33B H 0.1568 0.4984 0.1712 0.256 Uiso 1 1 calc R . . 
H33C H 0.1611 0.5152 0.2305 0.256 Uiso 1 1 calc R . . 
C34 C 0.1722(13) 0.3276(10) 0.3919(4) 0.111(4) Uani 1 1 d . . . 
H34A H 0.1113 0.3015 0.3746 0.133 Uiso 1 1 calc R . . 
H34B H 0.1717 0.2938 0.4287 0.133 Uiso 1 1 calc R . . 
C35 C 0.1054(14) 0.4508(11) 0.3918(5) 0.144(5) Uani 1 1 d . . . 
H35A H 0.1031 0.4869 0.3554 0.173 Uiso 1 1 calc R . . 
H35B H 0.1617 0.4789 0.4103 0.173 Uiso 1 1 calc R . . 
C36 C -0.0487(17) 0.4785(13) 0.4197(6) 0.179(6) Uani 1 1 d . . . 
H36A H -0.1067 0.4569 0.3990 0.215 Uiso 1 1 calc R . . 
H36B H -0.0463 0.4348 0.4545 0.215 Uiso 1 1 calc R . . 
C37 C -0.1146(18) 0.5959(16) 0.4262(6) 0.229(8) Uani 1 1 d . . . 
H37A H -0.0481 0.6213 0.4399 0.343 Uiso 1 1 calc R . . 
H37B H -0.2008 0.6076 0.4508 0.343 Uiso 1 1 calc R . . 
H37C H -0.1393 0.6380 0.3923 0.343 Uiso 1 1 calc R . . 
C38 C 0.4260(12) 0.3226(9) 0.3890(5) 0.113(4) Uani 1 1 d . . . 
H38A H 0.5203 0.2976 0.3685 0.136 Uiso 1 1 calc R . . 
H38B H 0.3900 0.4048 0.3841 0.136 Uiso 1 1 calc R . . 
C39 C 0.4477(15) 0.2868(11) 0.4462(6) 0.154(5) Uani 1 1 d . . . 
H39A H 0.4889 0.2049 0.4526 0.185 Uiso 1 1 calc R . . 
H39B H 0.3561 0.3123 0.4684 0.185 Uiso 1 1 calc R . . 
C40 C 0.555(3) 0.3426(18) 0.4592(7) 0.239(11) Uani 1 1 d . . . 
H40A H 0.6379 0.3255 0.4325 0.286 Uiso 1 1 calc R . . 
H40B H 0.5064 0.4241 0.4556 0.286 Uiso 1 1 calc R . . 
C41 C 0.596(3) 0.3151(18) 0.5010(8) 0.298(13) Uani 1 1 d . . . 
H41A H 0.5171 0.3128 0.5274 0.447 Uiso 1 1 calc R . . 
H41B H 0.6362 0.3686 0.5089 0.447 Uiso 1 1 calc R . . 
H41C H 0.6697 0.2414 0.5013 0.447 Uiso 1 1 calc R . . 
  
loop_ 
 _atom_site_aniso_label 
 _atom_site_aniso_U_11 
 _atom_site_aniso_U_22 
 _atom_site_aniso_U_33 
 _atom_site_aniso_U_23 
 _atom_site_aniso_U_13 
 _atom_site_aniso_U_12 
Br1 0.1311(10) 0.0738(7) 0.0725(7) -0.0134(5) 0.0026(6) -0.0151(7) 
Br2 0.1499(11) 0.0838(8) 0.0871(8) -0.0178(6) 0.0281(7) -0.0133(8) 
Br3 0.1696(13) 0.0962(10) 0.1175(10) 0.0387(7) -0.0057(9) -0.0017(9) 
Br4 0.0752(7) 0.0791(7) 0.0971(8) -0.0030(5) -0.0145(5) -0.0384(6) 
Br5 0.0676(6) 0.0600(6) 0.0804(7) -0.0023(5) -0.0158(5) -0.0274(5) 
Cu1 0.0743(8) 0.0504(7) 0.0720(8) -0.0074(5) -0.0092(6) -0.0126(6) 
Cu2 0.0860(8) 0.0633(8) 0.0657(8) -0.0033(6) -0.0005(6) -0.0183(7) 
Cu3 0.1147(10) 0.0603(8) 0.0846(9) 0.0105(6) -0.0018(7) -0.0214(7) 
O1 0.142(7) 0.079(5) 0.089(6) 0.028(4) -0.009(5) -0.015(5) 
O2 0.135(7) 0.050(5) 0.114(6) -0.007(4) -0.023(5) -0.002(4) 
O3 0.198(13) 0.219(14) 0.099(8) -0.011(8) 0.046(7) -0.042(10) 
O4 0.267(13) 0.181(11) 0.110(8) 0.048(7) 0.032(7) -0.043(10) 
O5 0.135(8) 0.052(6) 0.252(11) -0.012(6) 0.019(7) -0.018(5) 
O6 0.151(8) 0.103(7) 0.171(9) -0.063(7) 0.013(8) -0.037(6) 
N1 0.061(5) 0.052(5) 0.054(5) -0.008(4) -0.007(4) -0.007(4) 
N2 0.069(5) 0.043(5) 0.061(5) 0.001(4) -0.006(4) -0.013(4) 
N3 0.086(6) 0.072(6) 0.066(6) -0.004(5) 0.003(5) -0.025(5) 
N4 0.105(7) 0.077(7) 0.071(7) 0.019(5) -0.013(5) -0.030(6) 
N5 0.085(6) 0.046(6) 0.100(7) -0.008(5) 0.005(5) -0.021(5) 
N6 0.083(6) 0.049(5) 0.070(6) -0.006(5) -0.011(4) -0.023(4) 
N7 0.081(6) 0.062(7) 0.085(7) 0.010(6) -0.024(5) -0.021(5) 
N8 0.165(13) 0.160(15) 0.082(11) 0.032(9) 0.004(9) -0.046(11) 
N9 0.084(7) 0.069(8) 0.167(12) -0.036(9) 0.007(8) -0.027(6) 
N10 0.047(5) 0.050(5) 0.076(5) -0.002(4) -0.012(4) -0.016(4) 
N11 0.098(7) 0.081(7) 0.098(8) -0.008(5) -0.004(6) -0.034(6) 
C1 0.062(6) 0.060(7) 0.076(8) -0.013(5) 0.006(5) -0.017(6) 
C2 0.081(7) 0.047(7) 0.066(7) -0.005(5) -0.011(5) -0.013(6) 
C3 0.080(7) 0.057(7) 0.058(7) 0.001(6) -0.021(5) -0.013(6) 
C4 0.160(12) 0.086(9) 0.082(10) 0.027(8) -0.023(8) -0.043(9) 
C5 0.147(12) 0.094(10) 0.079(10) -0.001(8) 0.004(8) -0.047(9) 
C6 0.111(9) 0.084(9) 0.083(9) 0.006(7) 0.003(7) -0.033(7) 
C7 0.076(7) 0.056(7) 0.101(8) -0.020(7) 0.001(6) -0.027(6) 
C8 0.064(7) 0.055(8) 0.126(10) -0.010(7) 0.005(7) -0.034(6) 
C9 0.082(8) 0.044(7) 0.136(11) 0.014(7) -0.009(7) -0.026(6) 
C10 0.069(6) 0.074(7) 0.073(7) -0.008(5) -0.002(5) -0.028(5) 
C11 0.121(9) 0.141(10) 0.073(8) -0.004(7) -0.017(7) -0.069(8) 
C12 0.138(11) 0.296(18) 0.042(8) 0.036(9) -0.028(7) -0.103(12) 
C13 0.204(17) 0.32(2) 0.131(14) 0.055(14) -0.009(12) -0.097(17) 
C14 0.059(7) 0.067(6) 0.086(7) -0.007(5) -0.022(5) -0.012(6) 
C15 0.078(8) 0.107(9) 0.102(8) -0.016(6) -0.007(6) -0.048(7) 
C16 0.061(8) 0.131(10) 0.134(10) -0.041(8) -0.013(7) -0.017(8) 
C17 0.089(9) 0.215(15) 0.154(12) -0.078(10) 0.041(8) -0.066(10) 
C18 0.079(7) 0.061(7) 0.082(7) -0.007(5) -0.005(5) -0.024(6) 
C19 0.106(9) 0.093(9) 0.125(10) -0.052(7) -0.025(7) -0.006(7) 
C20 0.171(14) 0.092(10) 0.157(14) -0.033(9) -0.021(10) -0.009(9) 
C21 0.179(14) 0.119(12) 0.28(2) -0.086(12) -0.133(14) 0.009(10) 
C22 0.054(6) 0.070(7) 0.075(7) -0.004(5) -0.020(5) -0.013(5) 
C23 0.082(7) 0.068(7) 0.082(7) -0.008(5) -0.021(6) -0.023(6) 
C24 0.073(7) 0.096(8) 0.078(8) -0.006(6) -0.024(6) -0.018(6) 
C25 0.114(9) 0.112(9) 0.112(9) -0.051(7) -0.027(7) -0.024(7) 
C26 0.158(12) 0.062(8) 0.123(10) 0.011(7) -0.032(8) -0.046(8) 
C27 0.166(14) 0.090(11) 0.166(13) -0.029(9) -0.035(10) -0.006(10) 
C28 0.31(2) 0.115(15) 0.197(19) 0.011(12) -0.084(17) -0.069(15) 
C29 0.33(3) 0.137(17) 0.30(3) 0.057(17) 0.01(2) -0.028(16) 
C30 0.105(9) 0.089(8) 0.110(10) -0.016(7) -0.010(7) -0.049(7) 
C31 0.123(10) 0.097(9) 0.136(11) -0.015(8) -0.003(8) -0.048(8) 
C32 0.095(10) 0.150(13) 0.145(12) 0.021(10) -0.011(8) -0.040(9) 
C33 0.127(12) 0.160(14) 0.217(16) 0.036(12) -0.048(11) -0.051(11) 
C34 0.103(10) 0.110(10) 0.112(9) -0.018(7) 0.009(7) -0.032(8) 
C35 0.101(11) 0.131(13) 0.182(13) -0.048(10) 0.029(9) -0.024(10) 
C36 0.139(15) 0.171(16) 0.175(14) -0.045(12) -0.001(11) 0.014(12) 
C37 0.182(17) 0.26(2) 0.182(16) -0.058(16) -0.001(12) 0.000(17) 
C38 0.105(9) 0.082(8) 0.150(12) -0.031(8) -0.018(8) -0.021(7) 
C39 0.161(13) 0.140(12) 0.166(15) -0.063(11) -0.057(11) -0.024(10) 
C40 0.33(3) 0.26(2) 0.133(17) -0.058(17) -0.122(17) -0.06(2) 
C41 0.40(3) 0.28(3) 0.25(3) -0.07(2) -0.13(3) -0.11(2) 
  
_geom_special_details 
; 
 All esds (except the esd in the dihedral angle between two l.s. planes) 
 are estimated using the full covariance matrix.  The cell esds are taken 
 into account individually in the estimation of esds in distances, angles 
 and torsion angles; correlations between esds in cell parameters are only 
 used when they are defined by crystal symmetry.  An approximate (isotropic) 
 treatment of cell esds is used for estimating esds involving l.s. planes. 
; 
  
loop_ 
 _geom_bond_atom_site_label_1 
 _geom_bond_atom_site_label_2 
 _geom_bond_distance 
 _geom_bond_site_symmetry_2 
 _geom_bond_publ_flag 
Br1 Cu1 2.4253(14) . ? 
Br2 Cu2 2.4132(15) . ? 
Br3 Cu3 2.4084(16) . ? 
Br4 Cu2 2.6452(14) . ? 
Br4 Cu1 2.6517(14) . ? 
Br4 Cu3 2.7502(16) . ? 
Br5 Cu3 2.6381(14) . ? 
Br5 Cu1 2.6979(14) . ? 
Br5 Cu2 2.8058(15) . ? 
Cu1 N1 1.946(7) . ? 
Cu1 N6 1.959(7) . ? 
Cu2 N3 1.917(7) . ? 
Cu2 N2 1.945(6) . ? 
Cu3 N4 1.941(8) . ? 
Cu3 N5 1.948(7) . ? 
O1 N7 1.220(8) . ? 
O2 N7 1.227(8) . ? 
O3 N8 1.190(13) . ? 
O4 N8 1.223(13) . ? 
O5 N9 1.216(12) . ? 
O6 N9 1.220(11) . ? 
N1 C3 1.331(9) . ? 
N1 N2 1.381(8) . ? 
N2 C1 1.321(9) . ? 
N3 C6 1.351(10) . ? 
N3 N4 1.363(9) . ? 
N4 C4 1.336(11) . ? 
N5 C9 1.345(10) . ? 
N5 N6 1.366(8) . ? 
N6 C7 1.347(10) . ? 
N7 C2 1.437(11) . ? 
N8 C5 1.465(15) . ? 
N9 C8 1.469(13) . ? 
N10 C14 1.494(9) . ? 
N10 C18 1.524(9) . ? 
N10 C10 1.533(9) . ? 
N10 C22 1.538(9) . ? 
N11 C38 1.505(12) . ? 
N11 C34 1.518(11) . ? 
N11 C30 1.530(10) . ? 
N11 C26 1.524(11) . ? 
C1 C2 1.361(10) . ? 
C2 C3 1.364(10) . ? 
C4 C5 1.366(13) . ? 
C5 C6 1.382(13) . ? 
C7 C8 1.387(12) . ? 
C8 C9 1.365(12) . ? 
C10 C11 1.506(10) . ? 
C11 C12 1.504(12) . ? 
C12 C13 1.385(14) . ? 
C14 C15 1.515(10) . ? 
C15 C16 1.515(11) . ? 
C16 C17 1.512(12) . ? 
C18 C19 1.510(11) . ? 
C19 C20 1.511(13) . ? 
C20 C21 1.344(13) . ? 
C22 C23 1.521(10) . ? 
C23 C24 1.515(10) . ? 
C24 C25 1.513(10) . ? 
C26 C27 1.495(14) . ? 
C27 C28 1.528(16) . ? 
C28 C29 1.272(17) . ? 
C30 C31 1.494(12) . ? 
C31 C32 1.548(13) . ? 
C32 C33 1.427(14) . ? 
C34 C35 1.465(13) . ? 
C35 C36 1.528(15) . ? 
C36 C37 1.424(17) . ? 
C38 C39 1.485(14) . ? 
C39 C40 1.57(2) . ? 
C40 C41 1.162(18) . ? 
  
loop_ 
 _geom_angle_atom_site_label_1 
 _geom_angle_atom_site_label_2 
 _geom_angle_atom_site_label_3 
 _geom_angle 
 _geom_angle_site_symmetry_1 
 _geom_angle_site_symmetry_3 
 _geom_angle_publ_flag 
Cu2 Br4 Cu1 81.07(4) . . ? 
Cu2 Br4 Cu3 79.28(4) . . ? 
Cu1 Br4 Cu3 78.76(4) . . ? 
Cu3 Br5 Cu1 79.95(4) . . ? 
Cu3 Br5 Cu2 78.39(4) . . ? 
Cu1 Br5 Cu2 77.41(4) . . ? 
N1 Cu1 N6 176.3(3) . . ? 
N1 Cu1 Br1 92.1(2) . . ? 
N6 Cu1 Br1 91.6(3) . . ? 
N1 Cu1 Br4 89.9(2) . . ? 
N6 Cu1 Br4 87.2(2) . . ? 
Br1 Cu1 Br4 138.34(6) . . ? 
N1 Cu1 Br5 87.9(2) . . ? 
N6 Cu1 Br5 89.7(2) . . ? 
Br1 Cu1 Br5 135.43(5) . . ? 
Br4 Cu1 Br5 86.23(4) . . ? 
N3 Cu2 N2 174.9(4) . . ? 
N3 Cu2 Br2 92.5(3) . . ? 
N2 Cu2 Br2 92.5(2) . . ? 
N3 Cu2 Br4 87.4(2) . . ? 
N2 Cu2 Br4 89.2(2) . . ? 
Br2 Cu2 Br4 144.13(6) . . ? 
N3 Cu2 Br5 89.2(3) . . ? 
N2 Cu2 Br5 86.8(2) . . ? 
Br2 Cu2 Br5 131.67(6) . . ? 
Br4 Cu2 Br5 84.20(4) . . ? 
N4 Cu3 N5 170.6(3) . . ? 
N4 Cu3 Br3 93.3(3) . . ? 
N5 Cu3 Br3 92.8(3) . . ? 
N4 Cu3 Br5 92.6(2) . . ? 
N5 Cu3 Br5 89.6(2) . . ? 
Br3 Cu3 Br5 125.96(7) . . ? 
N4 Cu3 Br4 85.1(3) . . ? 
N5 Cu3 Br4 86.0(3) . . ? 
Br3 Cu3 Br4 148.59(6) . . ? 
Br5 Cu3 Br4 85.44(4) . . ? 
C3 N1 N2 107.2(7) . . ? 
C3 N1 Cu1 131.1(7) . . ? 
N2 N1 Cu1 121.7(6) . . ? 
C1 N2 N1 107.5(7) . . ? 
C1 N2 Cu2 130.1(7) . . ? 
N1 N2 Cu2 122.2(6) . . ? 
C6 N3 N4 107.3(7) . . ? 
C6 N3 Cu2 129.0(8) . . ? 
N4 N3 Cu2 123.3(7) . . ? 
C4 N4 N3 108.8(8) . . ? 
C4 N4 Cu3 129.0(9) . . ? 
N3 N4 Cu3 121.9(7) . . ? 
C9 N5 N6 107.8(8) . . ? 
C9 N5 Cu3 129.2(9) . . ? 
N6 N5 Cu3 122.8(6) . . ? 
C7 N6 N5 109.2(8) . . ? 
C7 N6 Cu1 129.9(8) . . ? 
N5 N6 Cu1 120.8(6) . . ? 
O1 N7 O2 124.5(9) . . ? 
O1 N7 C2 117.3(9) . . ? 
O2 N7 C2 118.2(9) . . ? 
O3 N8 O4 128.0(15) . . ? 
O3 N8 C5 117.9(14) . . ? 
O4 N8 C5 113.9(14) . . ? 
O6 N9 O5 127.8(12) . . ? 
O6 N9 C8 115.5(12) . . ? 
O5 N9 C8 116.7(12) . . ? 
C14 N10 C18 109.0(6) . . ? 
C14 N10 C10 108.5(6) . . ? 
C18 N10 C10 110.8(6) . . ? 
C14 N10 C22 110.9(6) . . ? 
C18 N10 C22 109.2(6) . . ? 
C10 N10 C22 108.5(6) . . ? 
C38 N11 C34 110.9(8) . . ? 
C38 N11 C30 105.0(8) . . ? 
C34 N11 C30 110.3(8) . . ? 
C38 N11 C26 110.1(8) . . ? 
C34 N11 C26 107.8(8) . . ? 
C30 N11 C26 112.7(8) . . ? 
N2 C1 C2 109.9(8) . . ? 
C3 C2 C1 105.8(8) . . ? 
C3 C2 N7 127.6(9) . . ? 
C1 C2 N7 126.6(9) . . ? 
N1 C3 C2 109.6(8) . . ? 
N4 C4 C5 109.0(11) . . ? 
C4 C5 C6 106.1(11) . . ? 
C4 C5 N8 127.9(13) . . ? 
C6 C5 N8 126.0(14) . . ? 
N3 C6 C5 108.7(10) . . ? 
N6 C7 C8 106.9(9) . . ? 
C9 C8 C7 107.5(9) . . ? 
C9 C8 N9 126.1(11) . . ? 
C7 C8 N9 126.4(12) . . ? 
N5 C9 C8 108.6(9) . . ? 
C11 C10 N10 116.3(7) . . ? 
C10 C11 C12 110.2(8) . . ? 
C13 C12 C11 112.5(11) . . ? 
N10 C14 C15 116.6(7) . . ? 
C16 C15 C14 110.6(8) . . ? 
C15 C16 C17 112.9(9) . . ? 
C19 C18 N10 115.5(7) . . ? 
C20 C19 C18 113.2(9) . . ? 
C21 C20 C19 117.4(12) . . ? 
C23 C22 N10 115.4(7) . . ? 
C24 C23 C22 109.9(8) . . ? 
C25 C24 C23 112.4(8) . . ? 
C27 C26 N11 116.6(10) . . ? 
C26 C27 C28 116.0(13) . . ? 
C29 C28 C27 117.7(18) . . ? 
C31 C30 N11 114.5(9) . . ? 
C30 C31 C32 112.7(9) . . ? 
C33 C32 C31 116.5(12) . . ? 
C35 C34 N11 117.0(9) . . ? 
C34 C35 C36 108.8(11) . . ? 
C37 C36 C35 111.8(15) . . ? 
C39 C38 N11 118.4(11) . . ? 
C38 C39 C40 106.3(13) . . ? 
C41 C40 C39 116(3) . . ? 
  
_diffrn_measured_fraction_theta_max    0.996 
_diffrn_reflns_theta_full              23.28 
_diffrn_measured_fraction_theta_full   0.996 
_refine_diff_density_max    0.726 
_refine_diff_density_min   -0.575 
_refine_diff_density_rms    0.070 
  
